# Supplementary material for: [68Ga]Ga-NODAGA-E[(cRGDyK)]2 and [64Cu]Cu-DOTATATE PET Predict Improvement in Ischemic Cardiomyopathy
Source: MDPI journal article supplement (doi:10.3390/diagnostics13020268), 2023-01-11
Supplement: s1 [file s1]

Supplementary

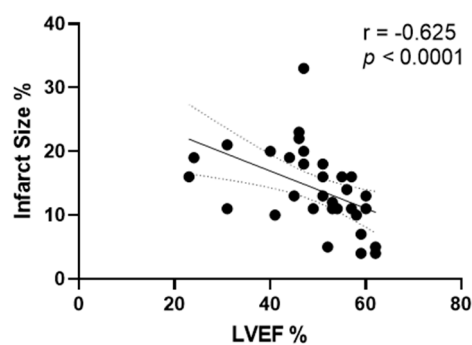

S1. Correlation between infarct area and LVEF.

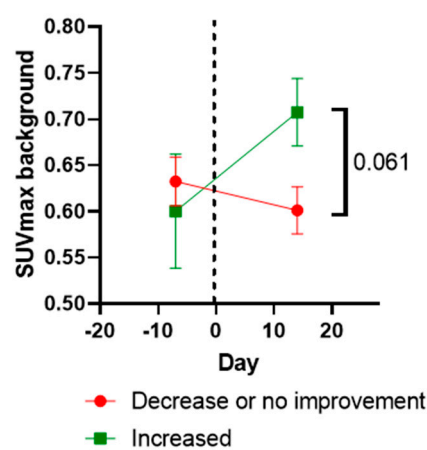

S2 [<sup>68</sup>Ga]Ga-RGD uptake in the remote area of the heart .

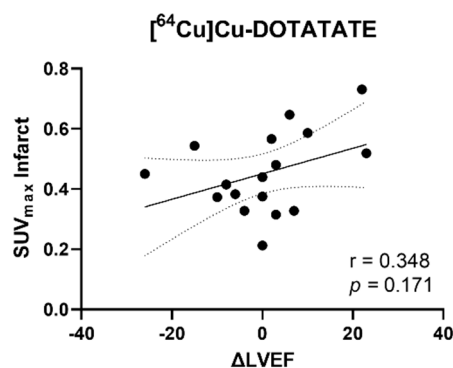

S3 [<sup>64</sup>Cu]Cu-DOTATATE uptake correlation with ΔLVEF.

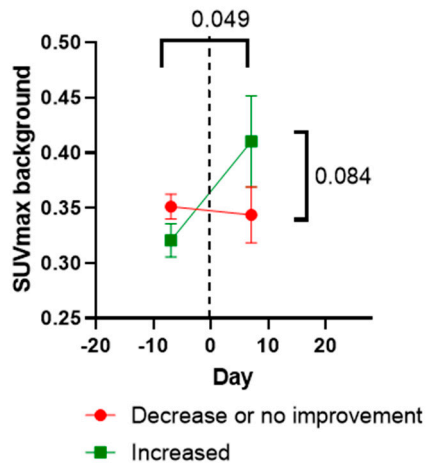

S4 [ $^{64}\text{Cu}$ ]Cu-DOTATATE uptake in the remote area of the heart.

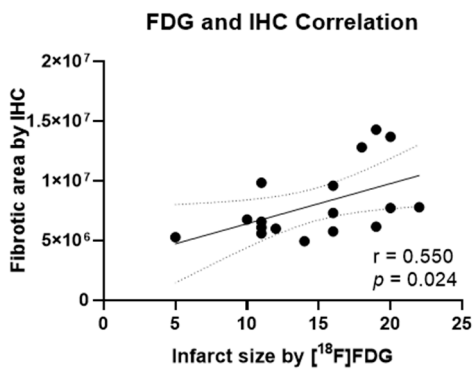

S5 Correlation between infarct size by 2- $^{18}\text{F}$ FDG blackout and fibrotic area on immunohistochemistry (IHC) by Masson's Trichrome.
